# Supplementary material for: High performance lithium-ion cells using one dimensional electrospun TiO2 nanofibers with spinel cathode
Source: Royal Society of Chemistry journal article supplement (doi:10.1039/c2ra20645e), 2012-01-01
Supplement: c2ra20645e.pdf [file c2ra20645e.pdf]

## Supplementary information

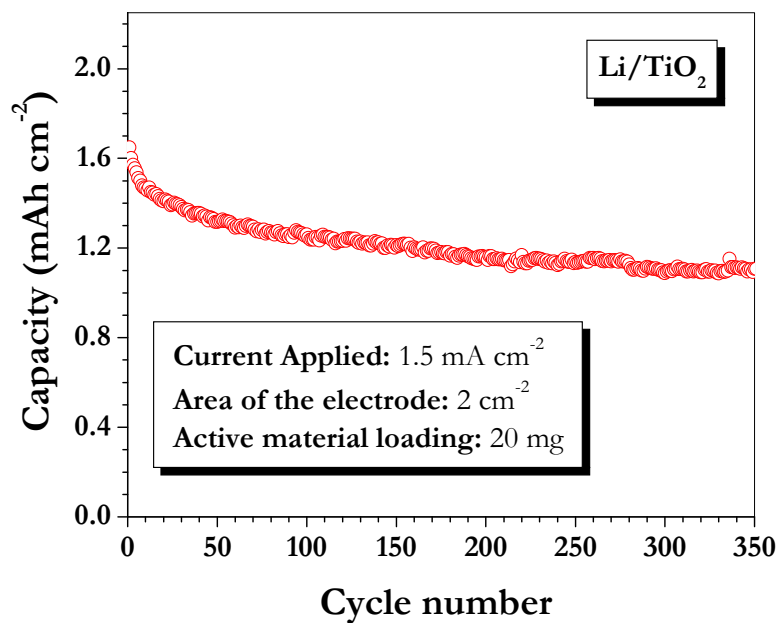

**Figure S1.** Plot of areal discharge capacity *vs.* Cycle number of Li/TiO<sub>2</sub> cell cycled between 1-3 V vs. Li at current density of 1.5 mA cm<sup>-2</sup>

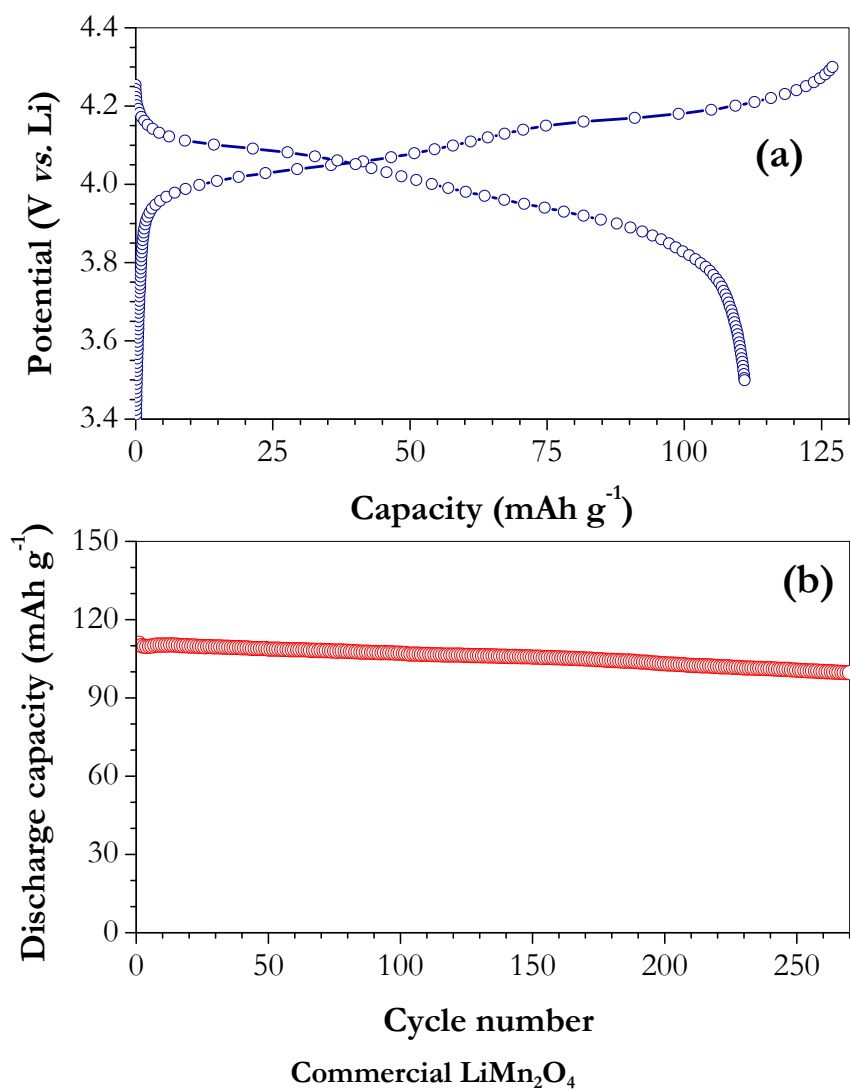

**Figure S2** Galvanostatic cycling performance (a) First charge-discharge curves of Li/LiMn<sub>2</sub>O<sub>4</sub> cell between 3.5-4.3 V at 150 mA g<sup>-1</sup> current density, and (b) Plot of discharge capacity *vs.* cycle number (270 cycles).
